# Supplementary material for: The Healing Capability of Clove Flower Extract (CFE) in Streptozotocin-Induced (STZ-Induced) Diabetic Rat Wounds Infected with Multidrug Resistant Bacteria
Source: MDPI journal article supplement (doi:10.3390/molecules27072270), 2022-03-31
Supplement: s1 [file s1]

**Supplementary Table S1.** Susceptibility of bacterial isolates to different antibiotics.

| Isolate No. | Cephalosporins    |                   |                   |                   | Polymyxins        | Penicillins        |                   |                   | Fluoroquinolone  | Aminoglycoside   |                  | Macrolides      | Sulfonamide       | MAR index (%) |
|-------------|-------------------|-------------------|-------------------|-------------------|-------------------|--------------------|-------------------|-------------------|------------------|------------------|------------------|-----------------|-------------------|---------------|
|             | FOX <sub>30</sub> | FEP <sub>30</sub> | CAZ <sub>30</sub> | CRO <sub>30</sub> | PB <sub>300</sub> | PRL <sub>100</sub> | IPM <sub>10</sub> | AMC <sub>30</sub> | CIP <sub>5</sub> | AK <sub>30</sub> | CN <sub>10</sub> | E <sub>15</sub> | SXT <sub>25</sub> |               |
| DFU1        | 20.00             | 22.00             | 14.00             | 19.00             | 12.00             | 18.00              | 27.00             | 20.00             | 19.00            | 20.00            | 17.00            | 22.00           | 26.00             | 0.00          |
| DFU2        | 20.00             | 10.00             | 12.00             | 10.00             | 0.00              | 15.00              | 20.00             | 12.00             | 20.00            | 13.00            | 8.00             | 20.00           | 20.00             | 7.70          |
| DFU3        | 25.00             | 8.00              | 10.00             | 22.00             | 14.00             | 10.00              | 28.00             | 28.00             | 10.00            | 16.00            | 17.00            | 15.00           | 20.00             | 0.00          |
| DFU4        | 23.00             | 20.00             | 17.00             | 15.00             | 13.00             | 25.00              | 21.00             | 10.00             | 28.00            | 18.00            | 15.00            | 10.00           | 25.00             | 0.00          |
| DFU5        | 24.00             | 15.00             | 15.00             | 20.00             | 0.00              | 12.00              | 17.00             | 10.00             | 30.00            | 13.00            | 15.00            | 0.00            | 20.00             | 15.4          |
| DFU6        | 18.00             | 25.00             | 17.00             | 30.00             | 0.00              | 20.00              | 15.00             | 23.00             | 30.00            | 15.00            | 20.00            | 0.00            | 18.0              | 15.4          |
| DFU7        | 12.00             | 0.00              | 15.0              | 20.00             | 0.00              | 10.00              | 10.00             | 12.00             | 25.00            | 18.00            | 8.00             | 0.00            | 0.00              | 30.7          |
| DFU8        | 15.00             | 12.00             | 15.00             | 18.00             | 15.00             | 15.00              | 18.00             | 14.0              | 26.00            | 15.00            | 10.00            | 0.00            | 0.00              | 15.40         |
| DFU9        | 22.00             | 0.00              | 0.00              | 0.00              | 0.00              | 10.00              | 13.00             | 12.00             | 0.00             | 15.00            | 8.00             | 0.00            | 0.00              | 53.8          |
| DFU10       | 12.00             | 12.00             | 20.00             | 30.00             | 18.00             | 15.00              | 25.00             | 28.00             | 0.00             | 20.00            | 10.00            | 0.00            | 0.0               | 23.1          |
| DFU11       | 0.00              | 0.00              | 20.00             | 12.00             | 12.00             | 0.00               | 25.00             | 18.00             | 0.00             | 20.00            | 11.00            | 0.00            | 0.00              | 46.2          |
| DFU12       | 19.00             | 7.00              | 0.00              | 8.00              | 0.00              | 0.00               | 18.00             | 29.00             | 8.00             | 13.00            | 0.00             | 0.00            | 0.00              | 46.2          |
| DFU13       | 10.00             | 0.00              | 12.00             | 12.00             | 0.00              | 12.00              | 16.00             | 0.00              | 17.00            | 12.00            | 0.00             | 0.00            | 0.00              | 46.1          |
| DFU14       | 22.00             | 30.00             | 21.00             | 0.00              | 0.00              | 0.00               | 17.00             | 30.00             | 20.00            | 15.00            | 7.00             | 8.00            | 7.00              | 23.1          |
| DFU15       | 25.00             | 29.00             | 30.00             | 28.00             | 11.00             | 35.00              | 25.00             | 42.00             | 0.00             | 27.00            | 12.00            | 17.00           | 18.00             | 7.7           |
| DFU16       | 18.00             | 35.00             | 38.00             | 31.00             | 17.00             | 17.00              | 21.00             | 15.00             | 18.00            | 18.00            | 7.00             | 0.00            | 0.00              | 15.4          |
| DFU17       | 14.00             | 35.00             | 40.00             | 25.00             | 0.00              | 15.00              | 12.00             | 14.00             | 20.00            | 10.00            | 10.00            | 0.00            | 0.00              | 23.1          |
| DFU18       | 10.00             | 12.00             | 14.00             | 10.00             | 14.00             | 15.00              | 17.00             | 20.00             | 12.00            | 17.00            | 0.00             | 15.00           | 0.00              | 15.4          |
| DFU19       | 20.00             | 10.00             | 10.00             | 15.00             | 18.00             | 25.00              | 26.00             | 26.00             | 20.00            | 20.00            | 16.00            | 12.00           | 25.00             | 0.00          |
| DFU20       | 15.00             | 0.00              | 0.00              | 12.00             | 15.00             | 20.00              | 11.00             | 16.00             | 0.00             | 13.00            | 12.00            | 15.00           | 0.00              | 30.8          |
| DFU21       | 15.00             | 16.00             | 15.00             | 12.00             | 10.00             | 0.00               | 17.00             | 11.00             | 18.00            | 16.00            | 0.00             | 0.00            | 0.00              | 30.8          |
| DFU22       | 15.00             | 15.00             | 10.00             | 15.00             | 10.00             | 12.00              | 15.00             | 20.00             | 17.00            | 15.00            | 15.00            | 0.00            | 25.00             | 7.7           |
| DFU23       | 15.00             | 15.00             | 13.00             | 15.00             | 0.00              | 14.00              | 12.00             | 10.00             | 17.00            | 12.00            | 0.00             | 0.00            | 11.00             | 23.1          |
| DFU24       | 14.00             | 0.00              | 15.00             | 14.00             | 12.00             | 10.00              | 10.00             | 0.00              | 0.00             | 15.00            | 20.00            | 0.00            | 0.00              | 38.5          |
| DFU25       | 26.00             | 13.00             | 15.00             | 11.00             | 15.00             | 12.00              | 18.00             | 17.00             | 26.00            | 12.00            | 12.00            | 0.00            | 22.00             | 7.7           |
| DFU26       | 20.00             | 0.00              | 10.00             | 0.00              | 10.00             | 15.00              | 20.00             | 15.00             | 22.00            | 20.00            | 17.00            | 0.00            | 22.00             | 23.1          |
| DFU27       | 25.00             | 0.00              | 15.00             | 0.00              | 0.00              | 17.00              | 20.00             | 15.00             | 23.00            | 0.00             | 0.00             | 25.00           | 22.00             | 38.4          |
| DFU28       | 26.00             | 11.00             | 12.00             | 0.00              | 0.00              | 17.00              | 22.00             | 15.00             | 22.00            | 0.00             | 0.00             | 22.00           | 22.00             | 30.8          |
| DFU29       | 20.00             | 0.00              | 0.00              | 0.00              | 20.00             | 0.00               | 25.00             | 12.00             | 0.00             | 15.00            | 14.00            | 0.00            | 0.00              | 53.8*         |
| DFU30       | 15.00             | 18.00             | 14.00             | 15.00             | 0.00              | 0.00               | 18.00             | 15.00             | 28.00            | 18.00            | 11.00            | 0.00            | 0.00              | 30.8          |
| DFU31       | 12.0              | 15.00             | 13.00             | 20.00             | 10.00             | 13.00              | 16.00             | 12.00             | 30.00            | 17.00            | 10.00            | 0.00            | 0.00              | 15.4          |
| %R          | 0.0               | 7.00              | 4.00              | 6.00              | 13.00             | 6.00               | 0.00              | 2.00              | 7.00             | 20.00            | 7.00             | 20.00           | 16.00             |               |
|             | 00%               | 29%               | 16%               | 25%               | 54%               | 25%                | 0.00%             | 8.3%              | 29%              | 8.3%             | 29%              | 83.3%           | 66.7%             |               |

AK<sub>30</sub>: Amikacin, AMC<sub>30</sub>: Amoxicillin, CAZ<sub>30</sub>: Ceftazidime, CIP<sub>5</sub>: Ciprofloxacin, CN<sub>10</sub>: Gentamicin, CRO<sub>30</sub>: Ceftriaxone, E<sub>15</sub>: Erythromycin, FEP<sub>30</sub>: Cefepime, FOX<sub>30</sub>: Cefoxitin, IPM<sub>10</sub>: Imipenem, PB<sub>300</sub>: Polymyxin, PRL<sub>100</sub>: Piperacillin, SXT<sub>25</sub>: Trimethoprim-sulphamethoxazol.

Supplementary Table S(1): Continued.

| Isolate No. | Cephalosporins    |                   |                   |                   | Polymyxins        | Penicillins        |                   |                   | Fluoroquinolone  | Aminoglycoside   |                  | Macrolides      | Sulfonamide       | % Resistance |
|-------------|-------------------|-------------------|-------------------|-------------------|-------------------|--------------------|-------------------|-------------------|------------------|------------------|------------------|-----------------|-------------------|--------------|
|             | FOX <sub>30</sub> | FEP <sub>30</sub> | CAZ <sub>30</sub> | CRO <sub>30</sub> | PB <sub>300</sub> | PRL <sub>100</sub> | IPM <sub>10</sub> | AMC <sub>30</sub> | CIP <sub>5</sub> | AK <sub>30</sub> | CN <sub>10</sub> | E <sub>15</sub> | SXT <sub>25</sub> |              |
| DFU32       | 17.00             | 12.00             | 10.00             | 13.00             | 10.00             | 20.00              | 20.00             | 13.00             | 25.00            | 18.00            | 15.00            | 0.00            | 26.00             | 7.7          |
| DFU33       | 0.00              | 0.00              | 0.00              | 0.00              | 12.00             | 0.00               | 10.00             | 0.00              | 0.00             | 15.00            | 0.00             | 0.00            | 0.00              | 76.9         |
| DFU34       | 15.00             | 18.00             | 10.00             | 0.00              | 8.00              | 12.00              | 0.00              | 0.00              | 15.00            | 10.00            | 15.00            | 0.00            | 0.00              | 38.5         |
| DFU35       | 15.00             | 0.00              | 15.00             | 0.00              | 18.00             | 10.00              | 7.00              | 0.00              | 25.00            | 15.00            | 0.00             | 12.00           | 0.00              | 38.5         |
| DFU36       | 0.00              | 0.00              | 0.00              | 0.00              | 0.00              | 0.00               | 0.00              | 15.00             | 12.00            | 20.00            | 15.00            | 0.00            | 12.00             | 61.5         |
| DFU37       | 11.00             | 0.00              | 0.00              | 0.00              | 0.00              | 0.00               | 11.00             | 8.00              | 16.00            | 0.00             | 0.00             | 0.00            | 0.00              | 69.2         |
| DFU38       | 20.00             | 0.00              | 7.00              | 11.00             | 11.00             | 21.00              | 22.00             | 12.00             | 0.00             | 13.00            | 9.00             | 0.00            | 0.00              | 30.8         |
| DFU39       | 17.00             | 0.00              | 0.00              | 12.00             | 0.00              | 13.00              | 8.00              | 14.00             | 4.00             | 15.00            | 0.00             | 0.00            | 0.00              | 46.2         |
| DFU40       | 0.0               | 18.00             | 17.00             | 40.00             | 12.00             | 20.00              | 16.00             | 40.00             | 0.00             | 16.00            | 12.00            | 0.00            | 0.00              | 30.8         |
| DFU41       | 18.00             | 12.00             | 10.00             | 18.00             | 11.00             | 16.00              | 15.00             | 15.00             | 20.00            | 18.00            | 15.00            | 0.00            | 0.00              | 15.4         |
| DFU42       | 22.00             | 23.00             | 18.00             | 12.00             | 0.00              | 15.00              | 23.00             | 17.00             | 36.00            | 21.00            | 13.00            | 0.00            | 0.00              | 23.1         |
| DFU43       | 18.00             | 12.00             | 0.00              | 9.00              | 0.00              | 20.00              | 12.00             | 17.00             | 0.00             | 12.00            | 7.00             | 0.00            | 8.00              | 30.8         |
| DFU44       | 21.00             | 15.00             | 15.00             | 6.00              | 0.00              | 24.00              | 20.00             | 28.00             | 7.00             | 17.00            | 9.00             | 7.00            | 4.00              | 7.7          |
| DFU45       | 28.00             | 20.00             | 19.00             | 36.00             | 40.00             | 0.00               | 18.00             | 38.00             | 28.00            | 18.00            | 9.00             | 6.00            | 8.00              | 7.7          |
| DFU46       | 19.00             | 18.00             | 30.00             | 34.00             | 0.00              | 30.00              | 35.00             | 50.00             | 19.00            | 16.00            | 0.00             | 0.00            | 0.00              | 30.8         |
| DFU47       | 15.00             | 0.00              | 0.00              | 8.00              | 0.00              | 15.00              | 11.00             | 12.00             | 15.00            | 0.00             | 16.00            | 0.00            | 10.00             | 38.5         |
| DFU48       | 0.00              | 0.00              | 17.00             | 19.00             | 0.00              | 0.00               | 21.00             | 10.00             | 15.00            | 17.00            | 9.00             | 0.00            | 5.00              | 38.5         |
| DFU49       | 10.00             | 10.00             | 15.00             | 8.00              | 0.00              | 9.00               | 18.00             | 17.00             | 25.00            | 15.00            | 7.00             | 0.00            | 0.00              | 23.1         |
| DFU50       | 20.00             | 15.00             | 15.00             | 14.00             | 0.00              | 15.00              | 10.00             | 12.00             | 11.00            | 16.00            | 0.00             | 0.00            | 0.00              | 30.8         |
| DFU51       | 15.00             | 28.00             | 17.00             | 15.00             | 20.00             | 13.00              | 20.00             | 10.00             | 12.00            | 15.00            | 7.00             | 0.00            | 0.00              | 15.4         |
| DFU52       | 18.00             | 19.00             | 14.00             | 15.00             | 0.00              | 10.00              | 12.00             | 13.00             | 12.00            | 15.00            | 0.00             | 0.00            | 0.00              | 30.8         |
| DFU53       | 17.00             | 0.00              | 0.00              | 0.00              | 12.00             | 0.00               | 23.00             | 11.00             | 0.00             | 14.00            | 13.00            | 12.00           | 16.00             | 38.5         |
| DFU54       | 17.00             | 0.00              | 0.00              | 10.00             | 11.00             | 0.00               | 22.00             | 11.00             | 0.00             | 18.00            | 17.00            | 14.0            | 12.00             | 30.8         |
| DFU55       | 17.00             | 0.00              | 15.00             | 0.00              | 0.00              | 8.00               | 17.00             | 10.00             | 0.00             | 15.00            | 0.00             | 0.000           | 22.00             | 46.2         |
| DFU56       | 19.00             | 0.00              | 0.00              | 0.00              | 0.00              | 11.00              | 15.00             | 8.00              | 0.00             | 15.00            | 0.00             | 0.00            | 0.00              | 61.5         |
| DFU57       | 15.00             | 15.00             | 17.00             | 18.00             | 0.00              | 15.00              | 16.0              | 12.00             | 17.00            | 12.00            | 0.00             | 0.00            | 0.00              | 30.8         |
| DFU58       | 25.00             | 22.00             | 17.00             | 20.00             | 14.00             | 15.00              | 32.00             | 25.00             | 25.00            | 22.00            | 20.0             | 0.0             | 0.00              | 15.4         |
| DFU59       | 20.00             | 22.00             | 15.00             | 20.00             | 10.00             | 9.00               | 31.00             | 16.00             | 22.00            | 16.00            | 18.00            | 0.00            | 16.00             | 7.7          |
| DFU60       | 13.00             | 0.00              | 7.00              | 15.00             | 44.00             | 0.00               | 13.00             | 10.00             | 30.00            | 12.00            | 11.00            | 0.00            | 7.00              | 23.1         |
| DFU61       | 9.00              | 8.00              | 0.00              | 0.00              | 19.00             | 0.00               | 0.00              | 10.00             | 0.00             | 0.00             | 17.00            | 0.00            | 0.00              | 61.5         |
| DFU62       | 0.00              | 7.00              | 12.00             | 0.00              | 18.00             | 0.00               | 29.00             | 10.00             | 0.00             | 16.00            | 0.00             | 0.00            | 0.00              | 53.9         |
| DFU63       | 15.00             | 25.00             | 18.00             | 31.00             | 0.00              | 0.00               | 17.00             | 0.00              | 18.00            | 15.00            | 19.00            | 0.00            | 0.00              | 38.5         |
| DFU64       | 18.00             | 7.00              | 0.00              | 0.00              | 11.00             | 0.00               | 0.00              | 0.00              | 0.00             | 15.00            | 0.00             | 0.00            | 0.00              | 69.2         |
| R%          | 12.2              | 36.6              | 34.14             | 34.14             | 46.30             | 34.14              | 9.80              | 12.2              | 31.7             | 7.31             | 39.0             | 75.60           | 61.01             |              |

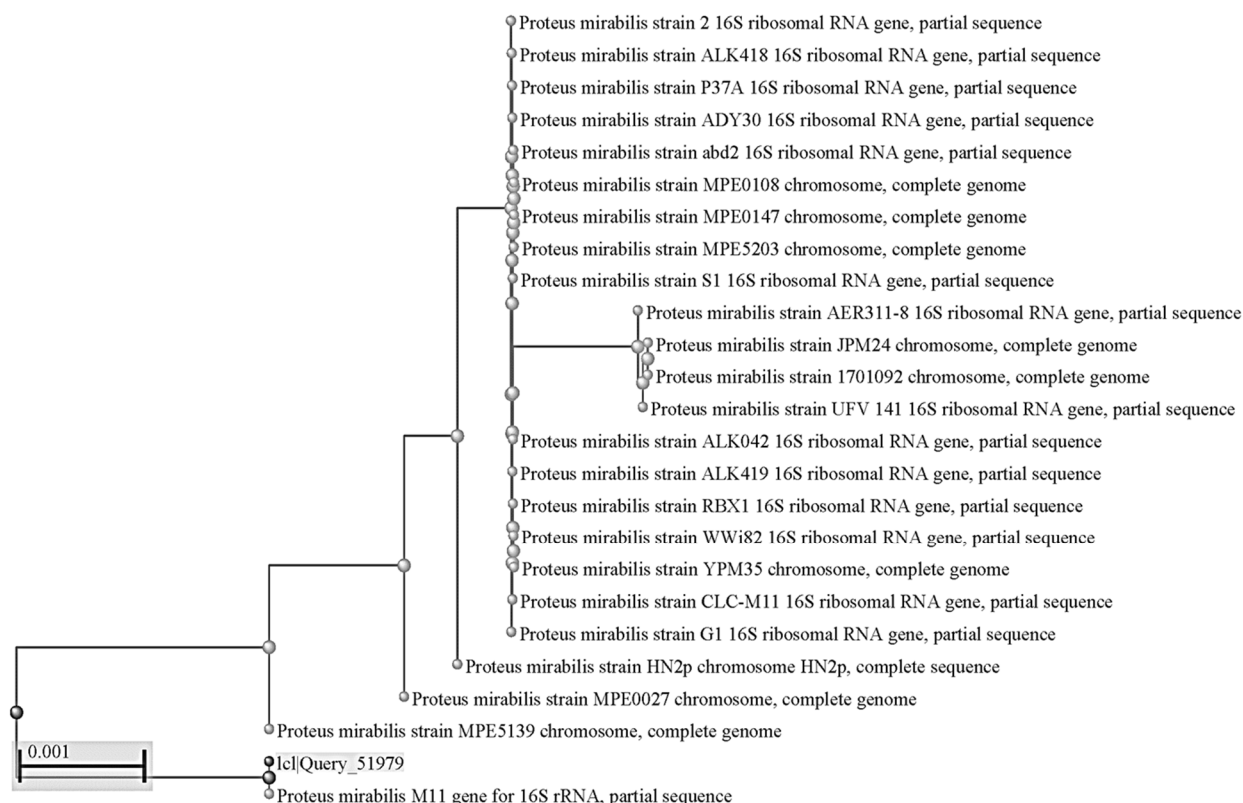

**Supplementary Figure S1.** Phylogenetic tree analysis based on 16 s rRNA nucleotide sequence alignment for *P. mirabilis* with other related members that possess the best similarity.

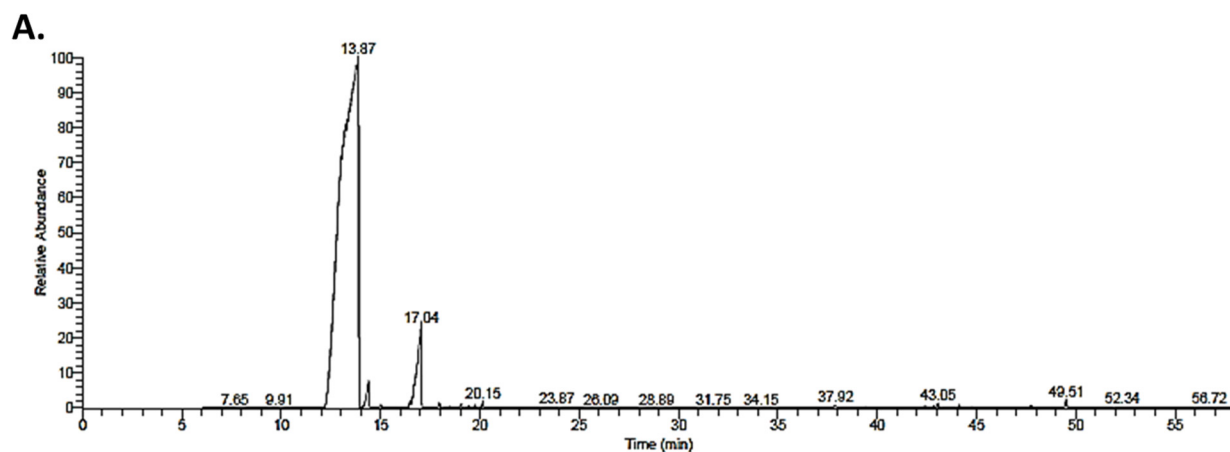

**Supplementary Figure S2.** GC-Mass of the *Syzygium aromaticum* ethanolic extract indicating retention time of different identified bioactive compounds.

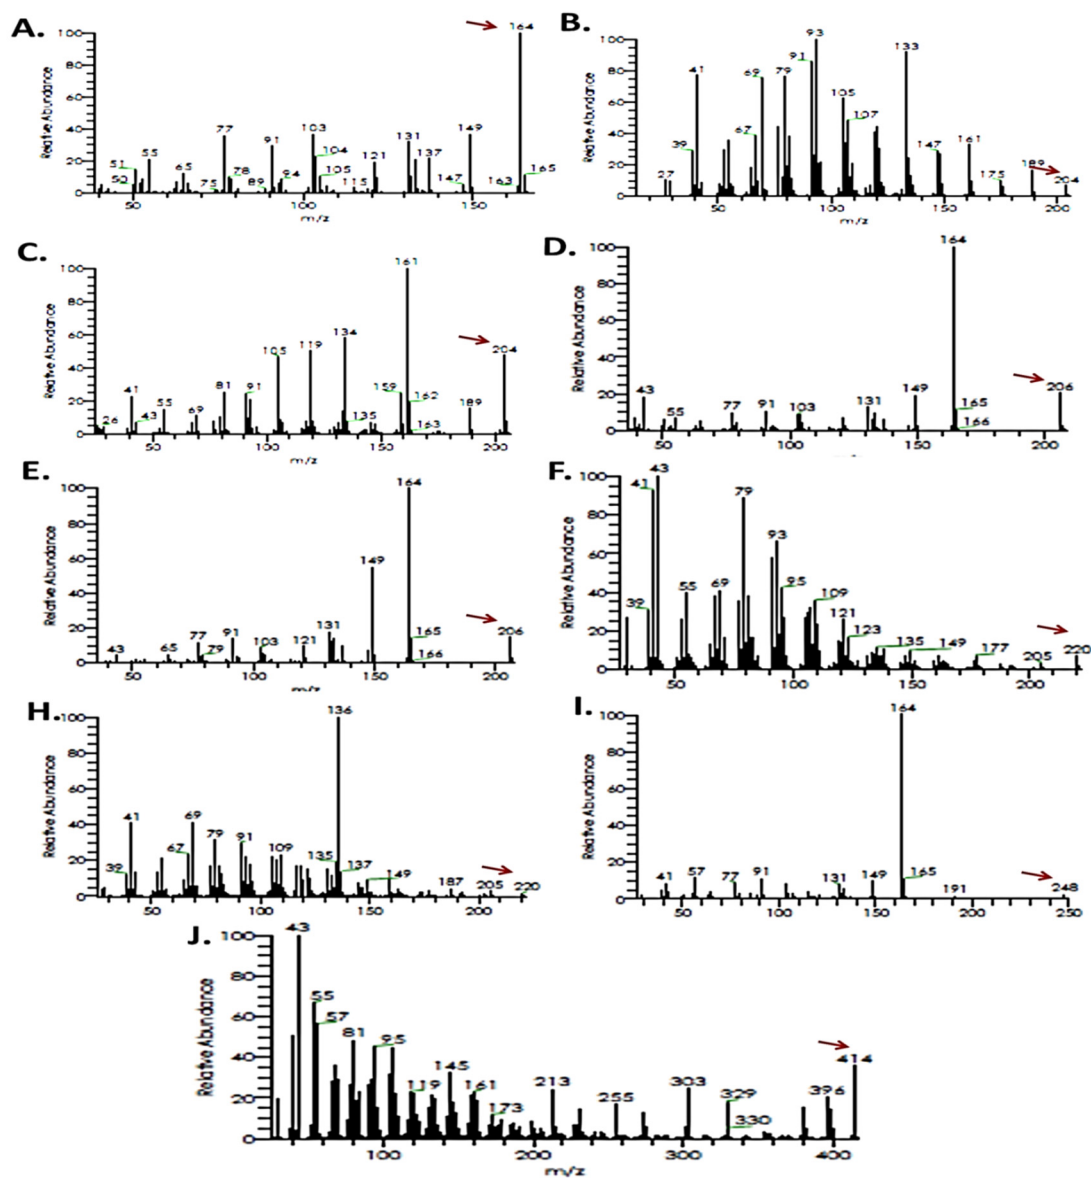

**Supplementary Figure S3.** GC-Mass fragmentation pattern of the different identified bioactive compounds from the ethanolic extract of the *Syzygium aromaticum* indicating molecular weight (m/z) of each compound (A. - I.). A. Eugenol (164 m/z), B. Caryophyllene (204 m/z), C. 3-Allyl-6-methoxyphenyl acetate (204 m/z), D. Phenol, 2-methoxy-4-(2-propenyl)-, acetate (206 m/z), E. Caryophyllene oxide (220 m/z), F. Caryophylla-4(12),8(13)-dien-5-ol (220 m/z), G. Benzene, 1,4-dimethyl-2-[(3-methyl phenyl)methyl] (210 m/z), H. Butanoic acid, 3-methyl-, 2-methoxy-4-(2-propenyl)phenyl ester (248 m/z), I. ç-Sitosterol (414 m/z).
